# Supplementary material for: Tunable wide blue photoluminescence with europium decorated graphene
Source: Royal Society of Chemistry journal article supplement (doi:10.1039/c4tc02361g), 2015-01-01

## Supplementary Information

**Figure S1.** : TEM image and scaled-up views of ultrasmall europium oxide nanoparticles.

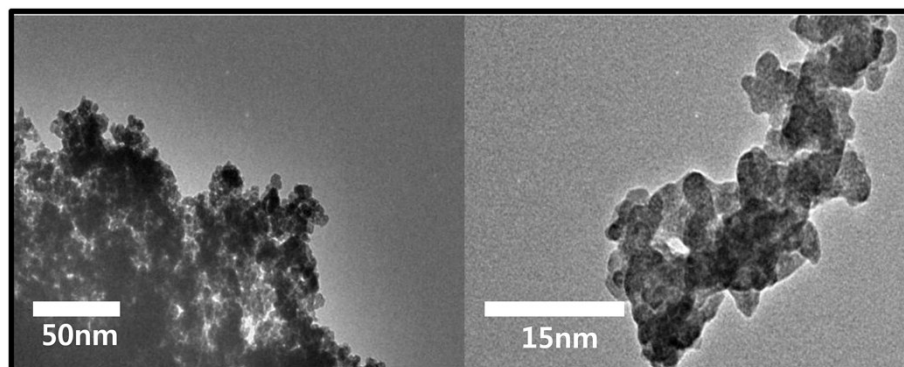

**Figure S2.** : (a)-(d) O1s XPS spectra of intrinsic EuG composite and annealed samples at 1000 °C with different concentrations of europium: (a) correspond to 0.05 wt%, (b) to 0.5 wt%, (c) to 1 wt%, and (d) to 50 wt%.

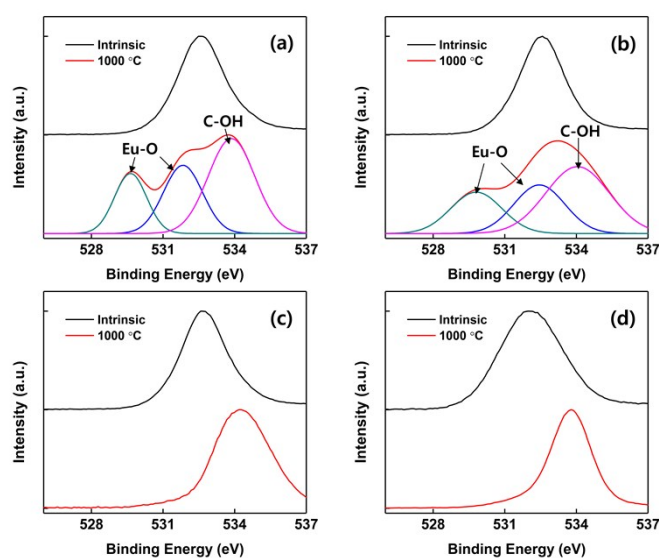

**Figure S3. :** At 458 nm emission, photoluminescence excitation spectra of (a) 0.05 wt%, (b) 0.5 wt%, (c) 1 wt% and (d) 50 wt% EuG with different temperatures from 400 to 1000 °C.

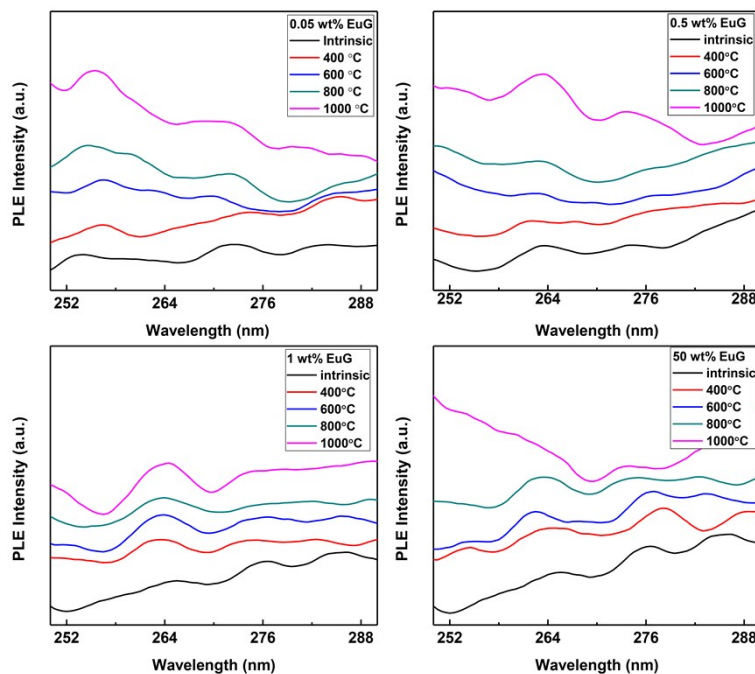

**Figure S4. :** Photoluminescence emission spectrum of reduced graphene oxide, europium decorated graphene (50 wt% of europium) both of samples annealed until 1000 °C.

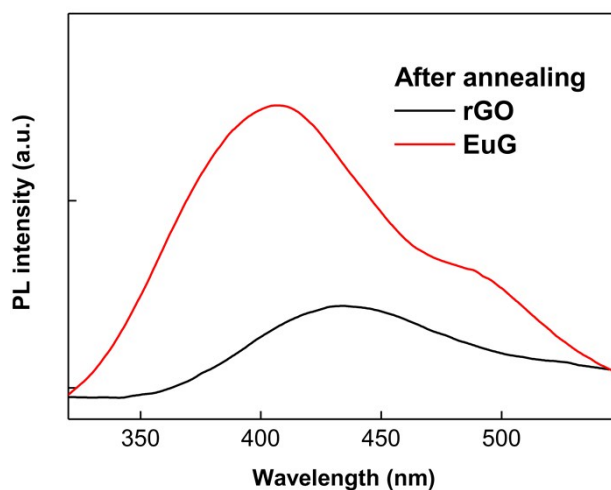

**Figure S5. :** Linear plots of integrated fluorescence intensity vs. absorbance and the equation for achievement of quantum yield with 0.05 wt% annealed EuG and Norharmane ( $\Phi = 0.51$ ).

$\Phi$  is the photoluminescence quantum yield,  $Grad$  is the gradient from the plot of integrated fluorescence intensity as a function of absorbance.  $n$  is the refractive index of the solvent containing sample.

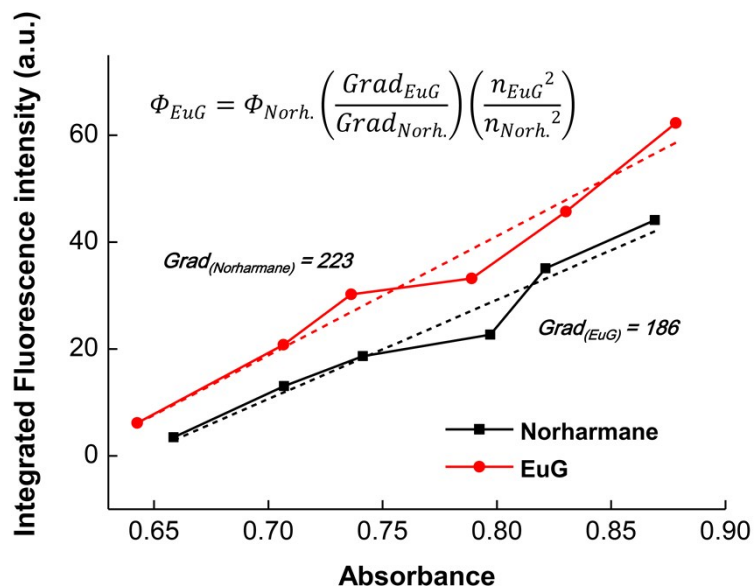

**Figure S6. :** (a)-(c) Microscope and (d)-(f) fluorescence images with mercury UV lamp: (a) and (d) correspond to GO, (b) and (e) to reduced GO, (c) and (f) to europium oxide crystal.

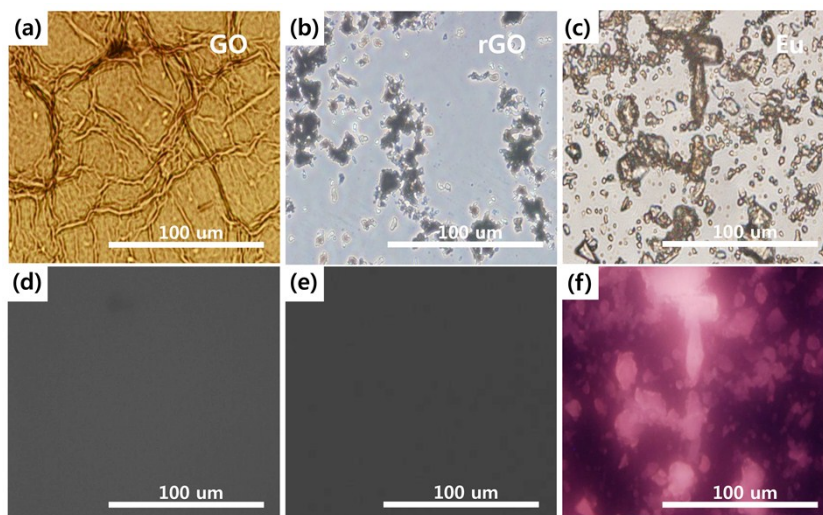

Supplement: c4tc02361g1.pdf [file c4tc02361g1.pdf]
